# Supplementary material for: Transcription factor assisted loading and enhancer dynamics dictate the hepatic fasting response
Source: HighWire-hosted journal article supplement (doi:10.1101/gr.212175.116), 2016-12-28
Supplement: Supplemental_material.docx [file Supplemental_material.docx]

**Supplemental material**

**Table of content**

1. Supplemental Figures and legends
2. Supplemental captions
3. Supplemental methods
4. Supplemental references

**Supplemental Figures and legends:**

**
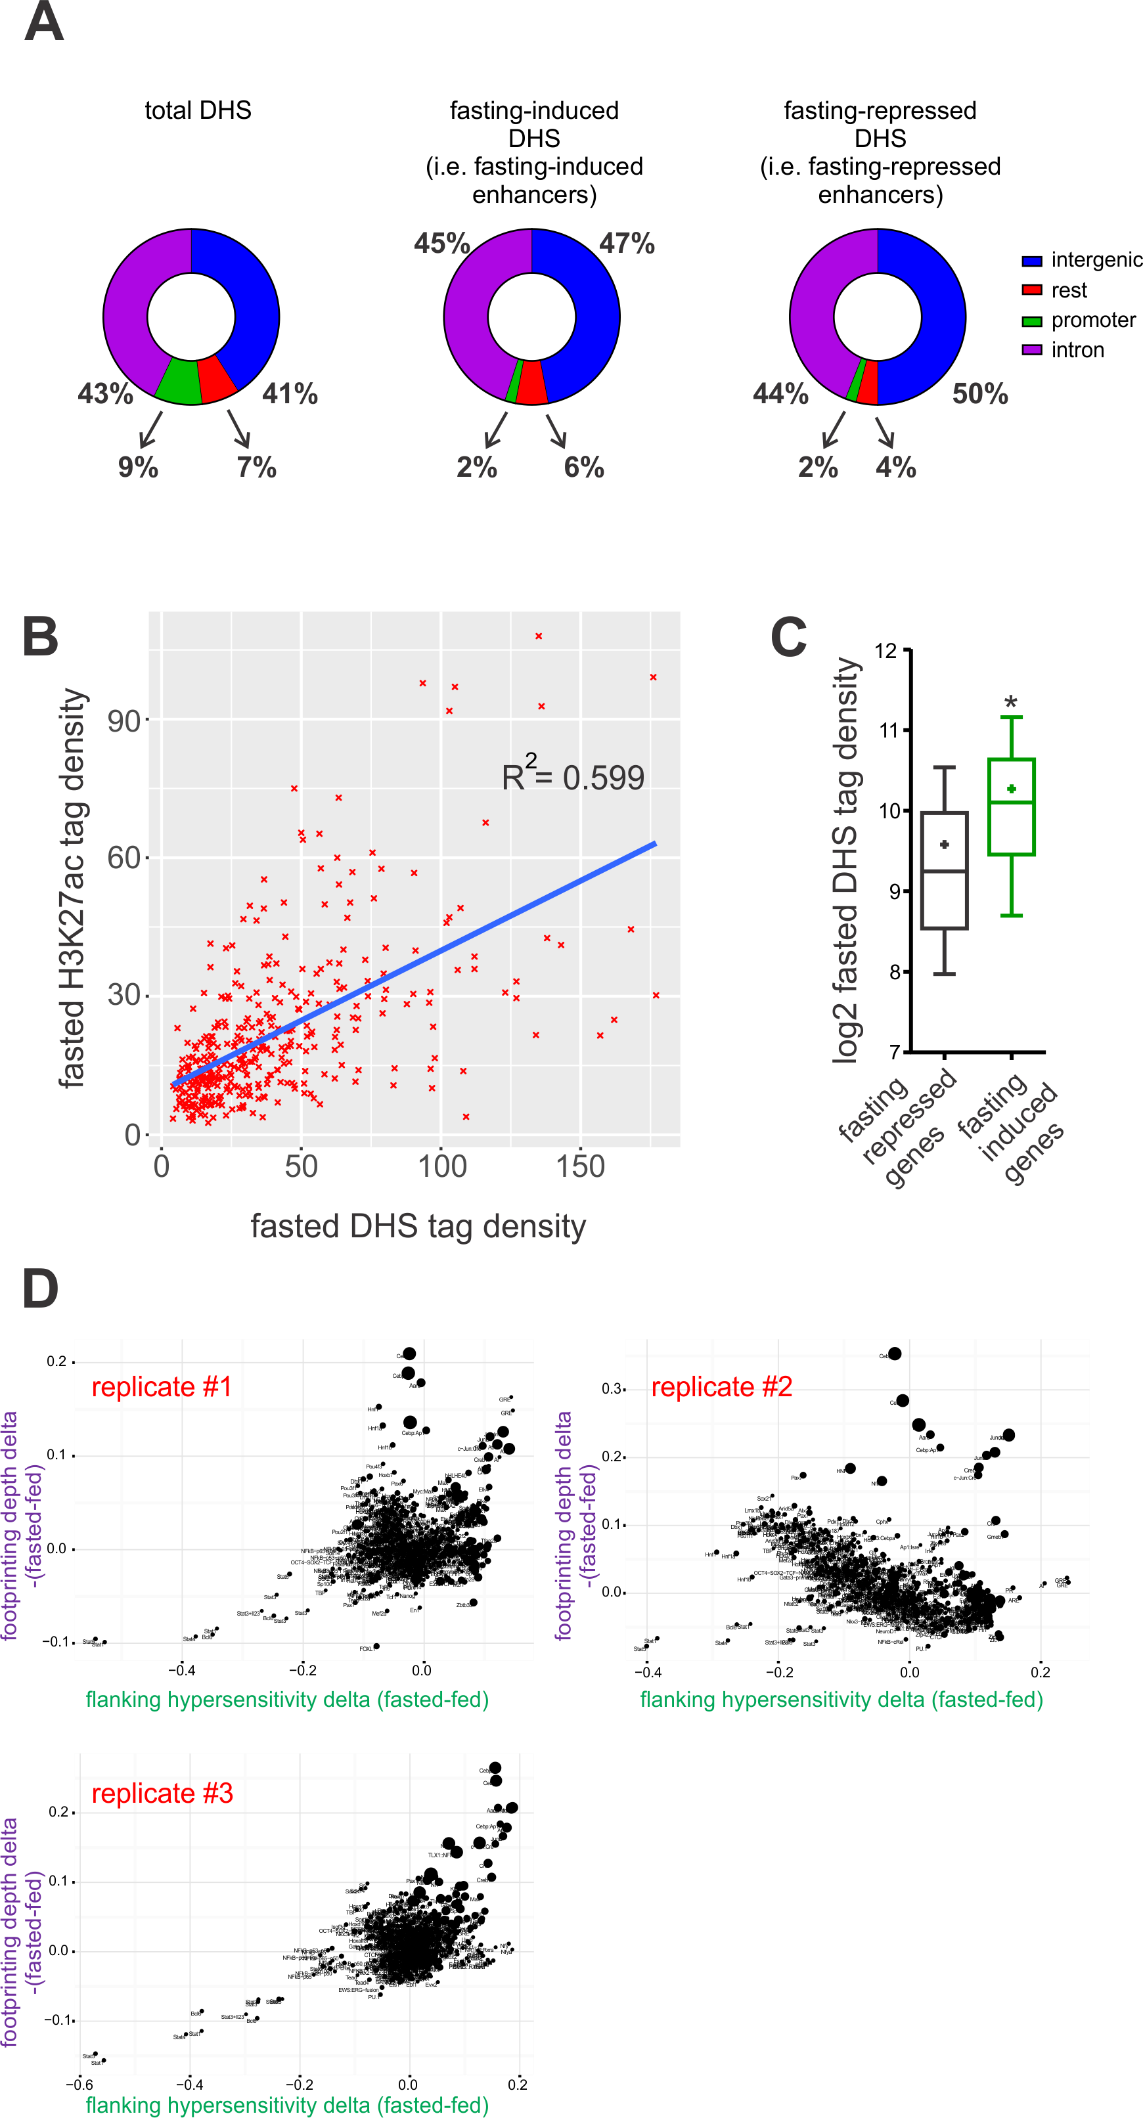
**

Supplemental Figure S1: Fasting-responsive DHS sites are mostly intergenic and correlate with H3K27ac and gene expression.

A. Genomic annotations of fasting-responsive DHS sites show that the fraction of DHS sites which is mostly over-represented compared to total DHS sites is intergenic.

B. Scatter plot depicting the correlation in signal strength between fasting-induced DHS sites and its overlapping fasting-induced H3K27ac sites.

C. DHS tag density following fasting around (+/-50 kb) fasting-regulated genes.

D. The number of DNase cuts (i.e. ‘cut count’) is collected at and around a motif in all motif occurrences within DHS sites. This cut count profile is then compared between the fed and fasted conditions and a delta value is given for each motif (x axis in scatter plot). Then, a log ratio between the observed and expected cut counts at the motif is calculated. This ratio is normalized to provide a reliable footprint depth value which is unaffected by surrounding hypersensitivity (for details see Methods). The delta value between footprint depth in the fasted and fed conditions is then given for each motif (y axis in scatter plot). The bigger the size of the circle marking the motif the deeper the footprint is in the fasted state. Cut count data for Fig.2B were pooled from three replicates. Here, single replicates were used, giving a similar pattern to Fig. 2B.


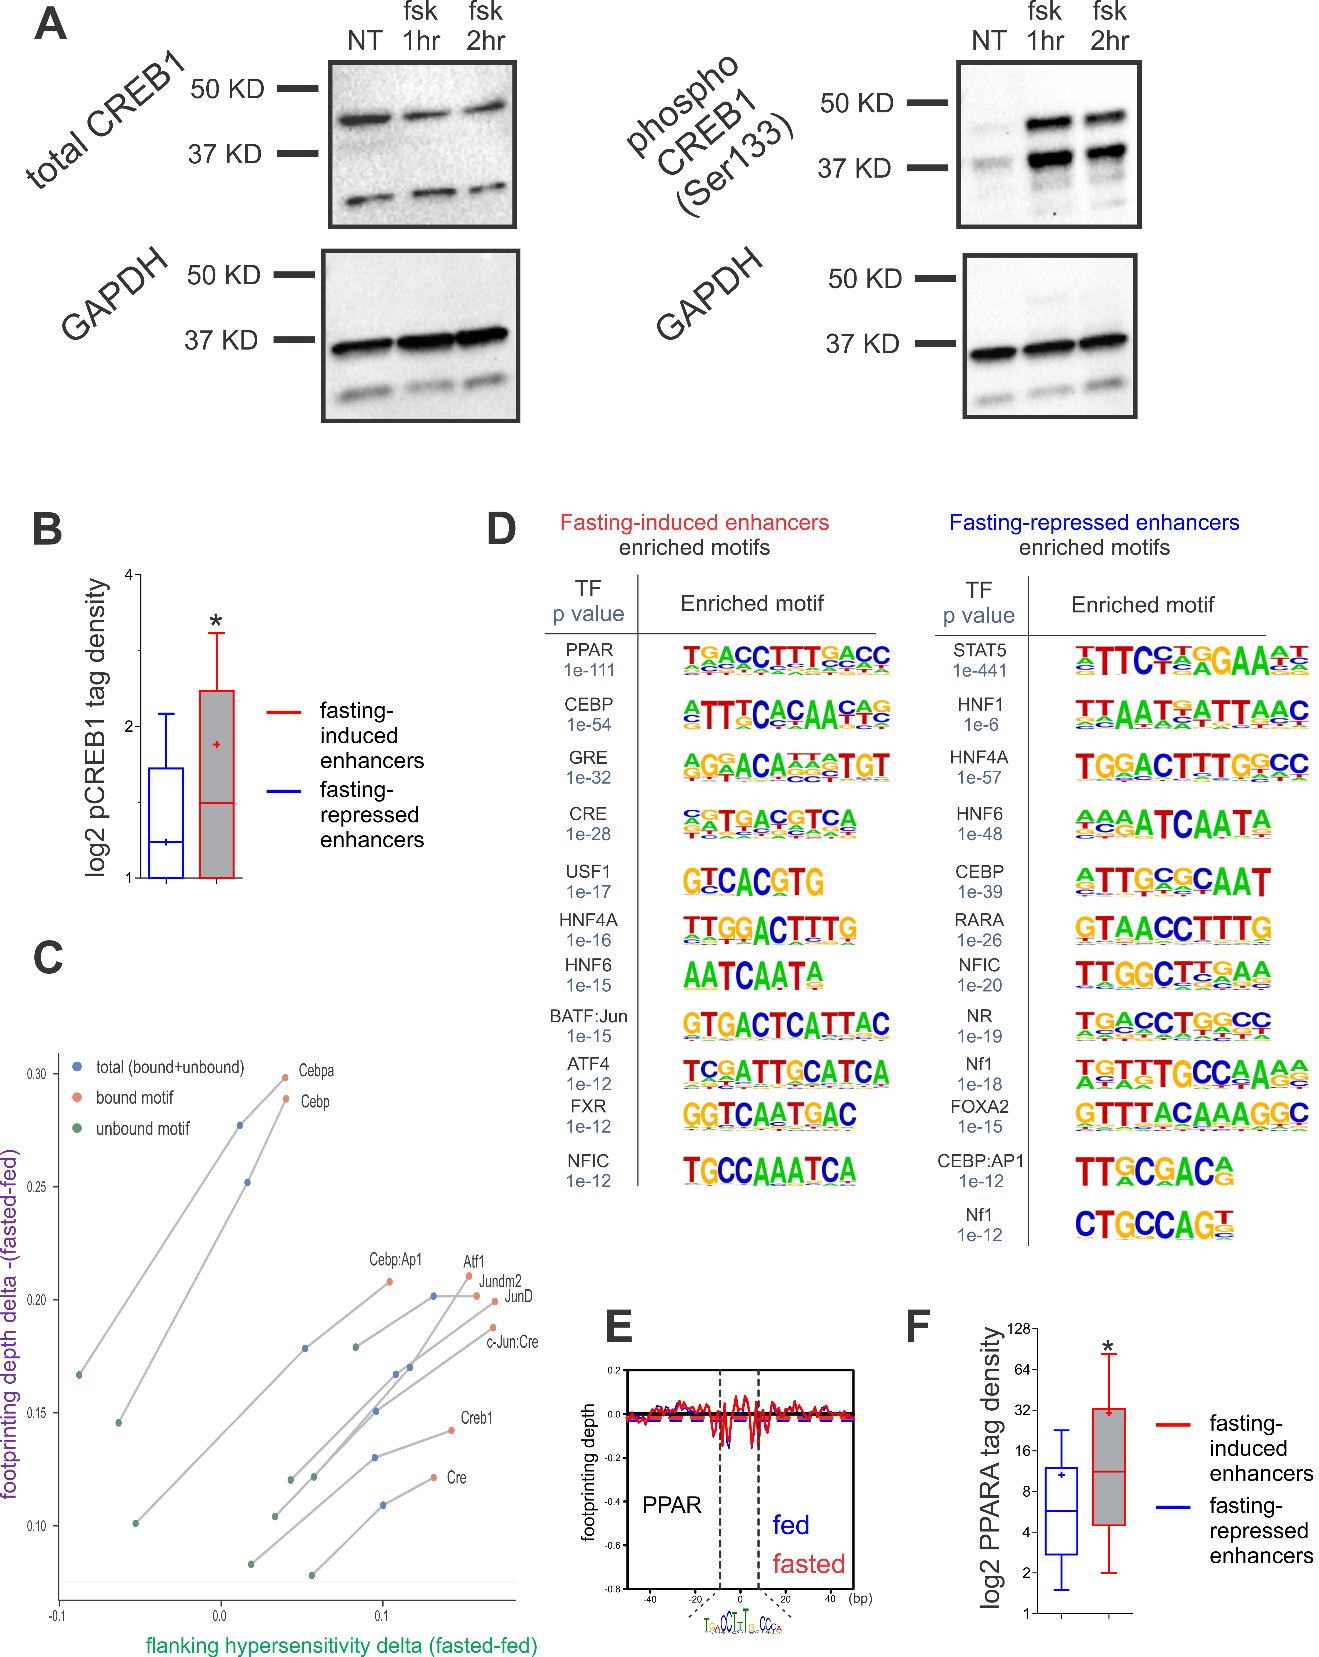


Supplemental Figure S2: motif, footprinting, flanking accessibility and ChIP-seq analyses support a key role for CREB1, GR, PPARA and CEBPB during fasting

A. Western blot of CREB1 and phospho-CREB1 (Ser133) following activation by forskolin in primary mouse hepatocytes.

B. Extent of pCREB1 binding at fasting-responsive enhancers in liver following fasting (24 hrs, measured by ChIP-seq tag density).

C. Scatter plot depicting changes in footprint depth and flanking accessibility of fasting-related motifs in total liver DHS sites (blue), in motifs within a called ChIP-seq peak (red) or in motifs residing in regions lacking a called ChIP-seq peak (green).

D. *de-novo* motif enrichment analysis of fasting-responsive enhancers in liver following fasting (24 hrs).

E. Individual footprint depth aggregate plot for the PPARE motif. Footprint depth is illustrated with horizontal dashed lines (red for fasted, blue for fed).

F. Extent of PPARA binding at fasting-responsive enhancers in liver following agonist activation (measured by ChIP-seq tag density obtained from (Boergesen et al. 2012))


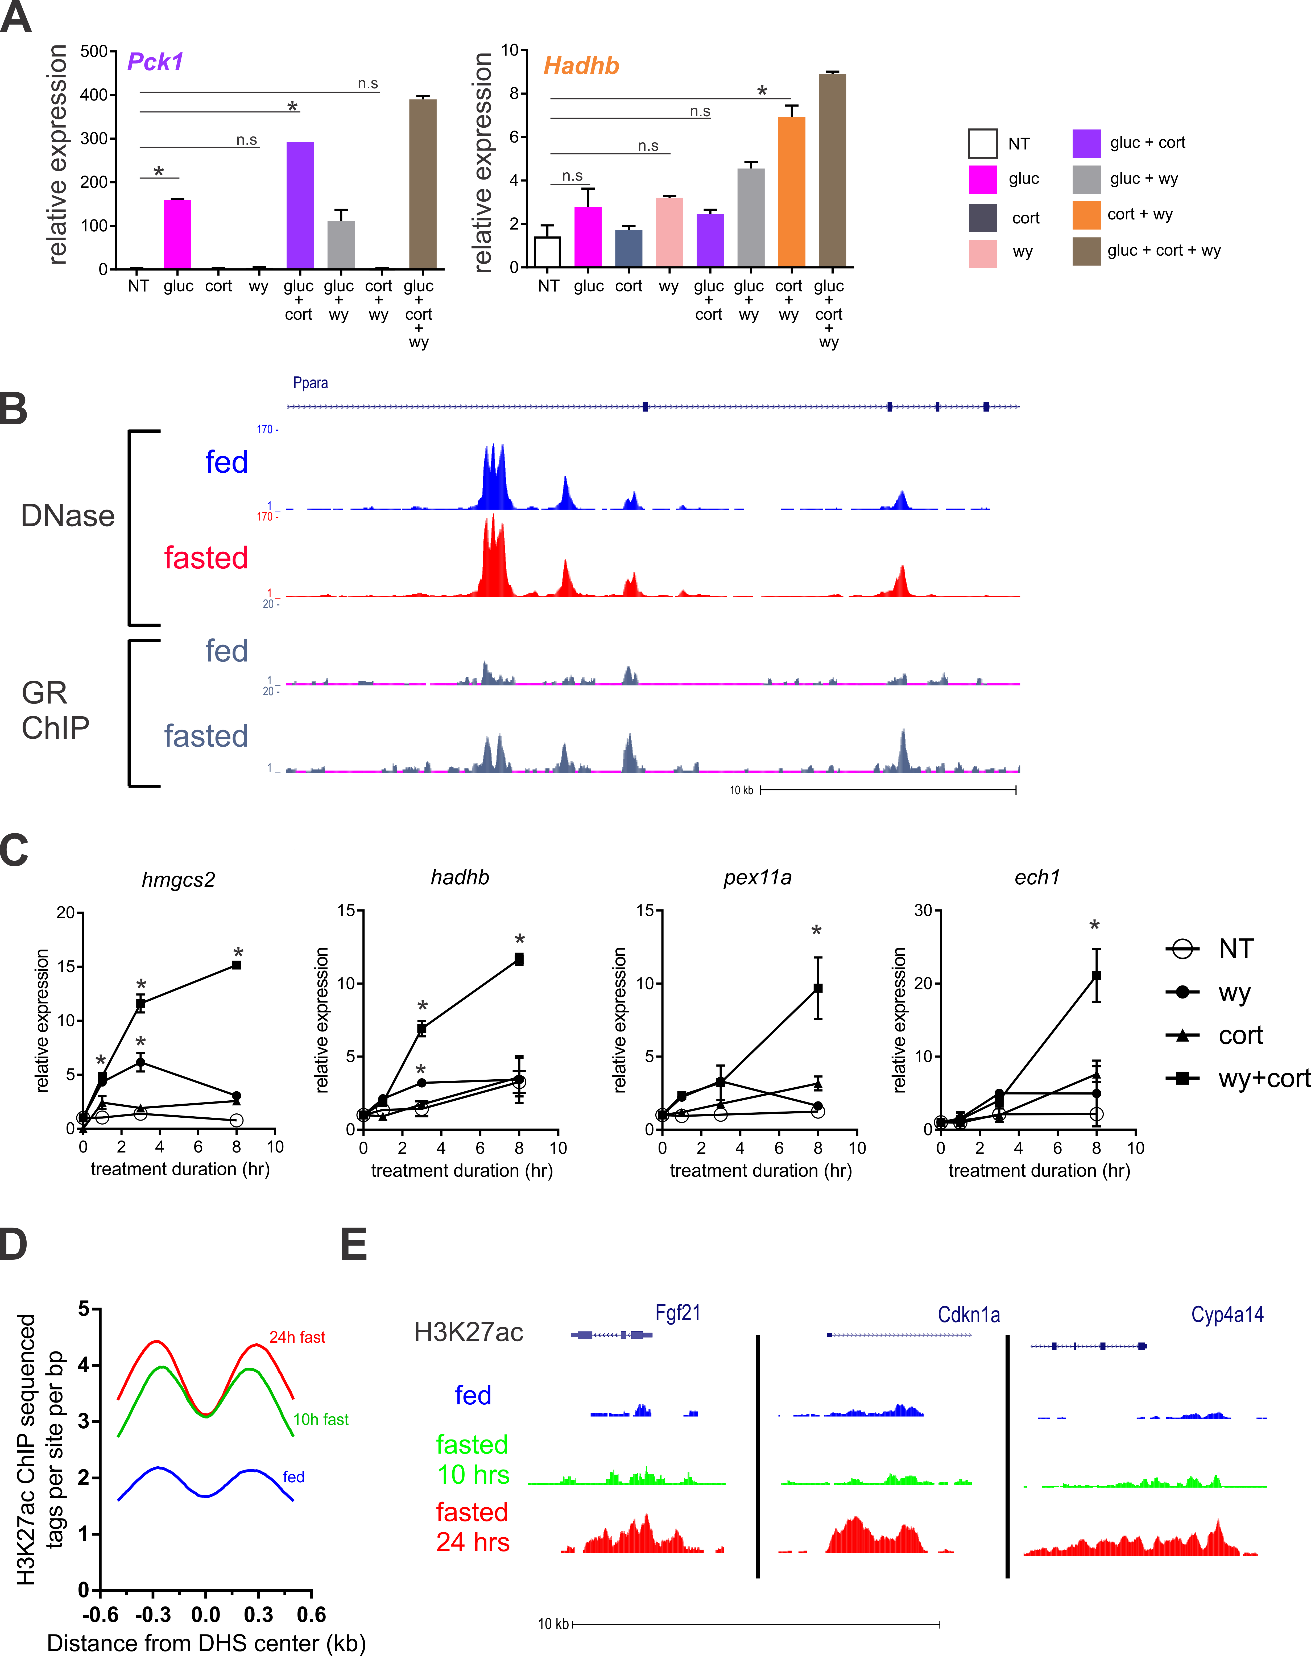


Supplemental Figure S3: delayed synergy in the GR-PPARA module and gradual activation of PPARA-targeted enhancers as fasting continues

A. Nascent RNA levels of fasting-induced genes in primary hepatocytes following a 3 hr treatment with different combinations of glucagon (gluc), corticosterone (cort) and WY-14643 (wy).

B. Genome browser tracks of DHS and GR ChIP-seq following fasting (24 hrs) at the *Ppara* gene body.

C. Nascent RNA levels of GR-PPARA target genes in primary hepatocytes following 1,3 and 8 hrs of treatment with different combinations of corticosterone (cort) and WY-14643 (wy). Asterisks denote statistical significance (p ≤ 0.05) compared to a non-treated sample (NT) in each time point.

D. H3K27ac levels (measured by ChIP-seq tag density) in liver following fasting (10 and 24 hrs) at fasting-induced enhancers harboring the PPARA motif.

E. Genome browser tracks of H3K27ac ChIP signal at PPARA-induced genes’ loci during fasting showing a gradual increase in signal as fasting continues.


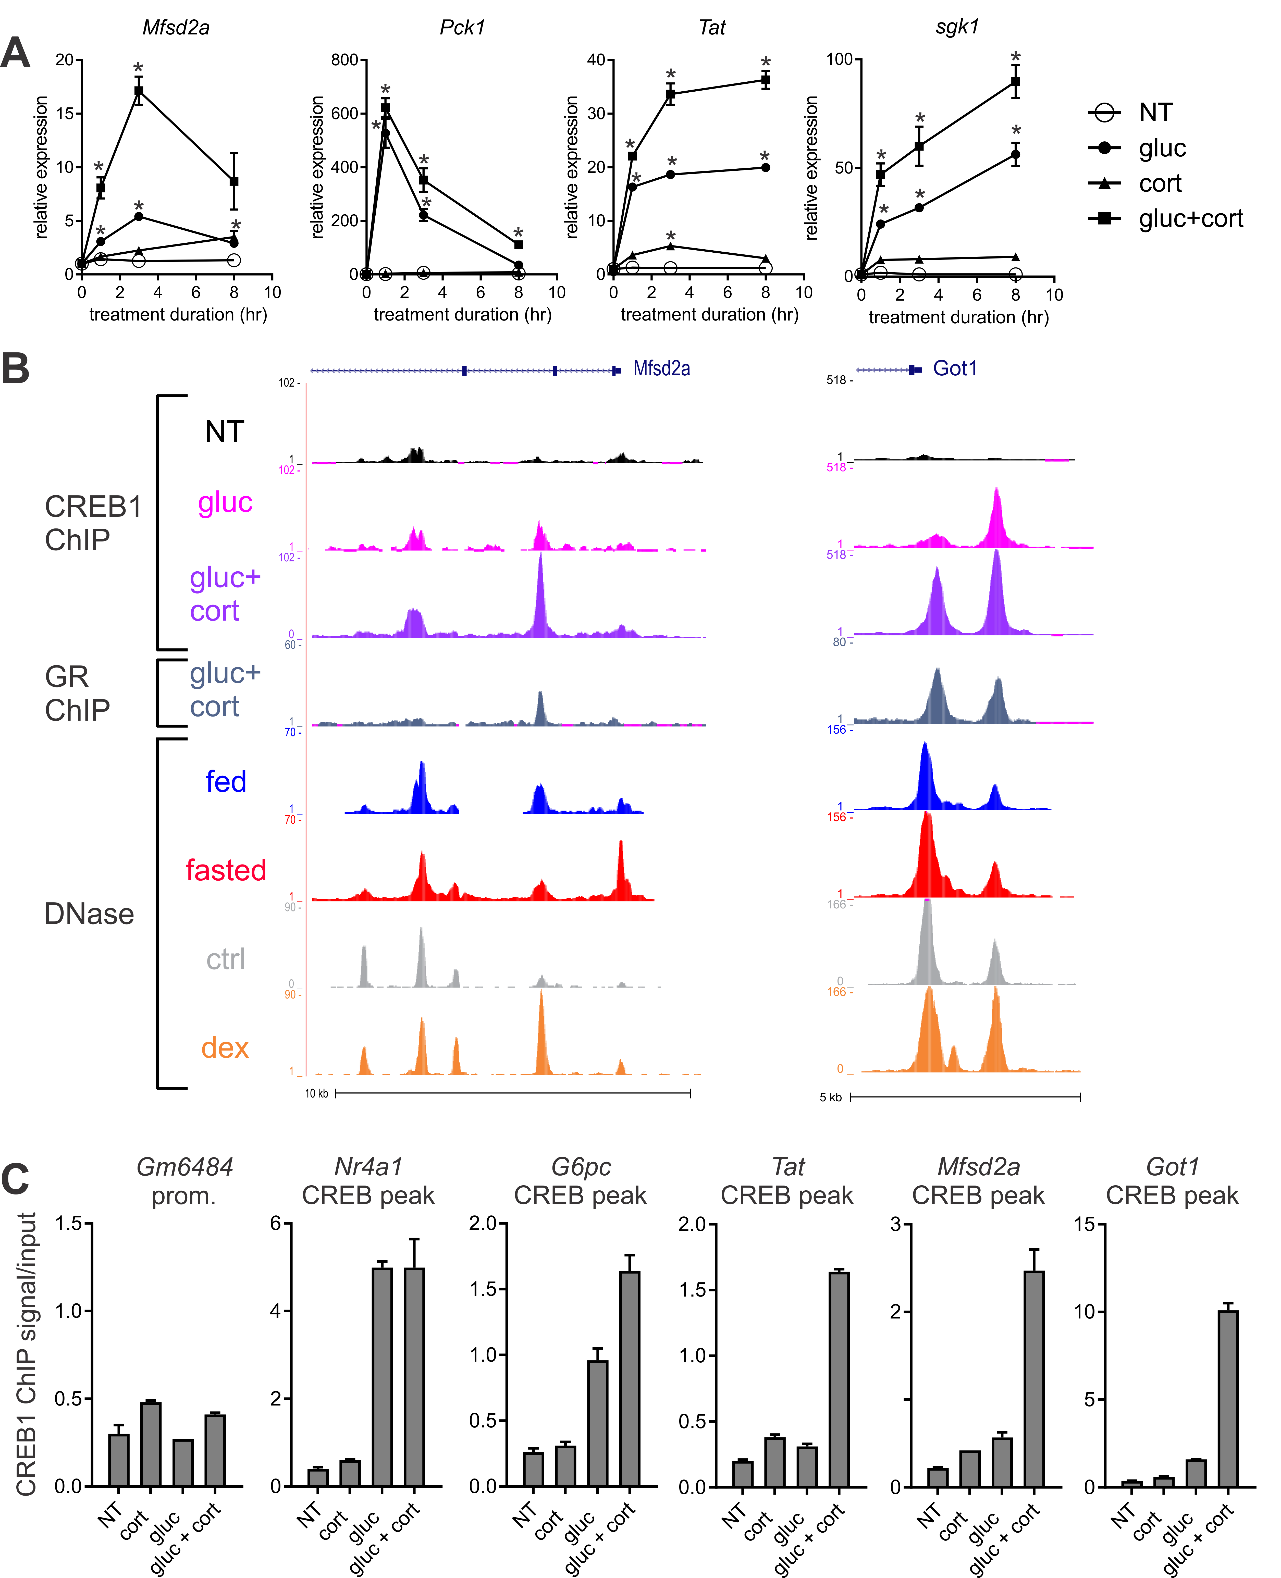


Supplemental Figure S4: corticosterone increases CREB1 binding

A. Nascent RNA levels of CREB1-GR target genes in primary hepatocytes following 1,3 and 8 hrs of treatment with different combinations of glucagon (gluc) and corticosterone (cort). Asterisks denote statistical significance (p ≤ 0.05) compared to a non-treated sample (NT) in each time point.

B. Genome browser tracks of the *Mfsd2a* and *Got1* loci depicting increases in CREB1 binding following glucagon treatment (1 hr) and co-treatment with corticosterone (1 hr) as well as increased accessibility following either fasting or GR activation by dexamethasone (dex). Adrenalectomized mice were treated with Dex (1mg/kg) for 1 hr, DNase-seq data generated and described in (Grontved et al. 2013)

C. CREB1 ChIP-PCR of several loci affected by glucagon and glucagon + corticosterone treatments. The site entitled ‘gm6484 promoter region’ serves as a control for a site unbound by CREB1.


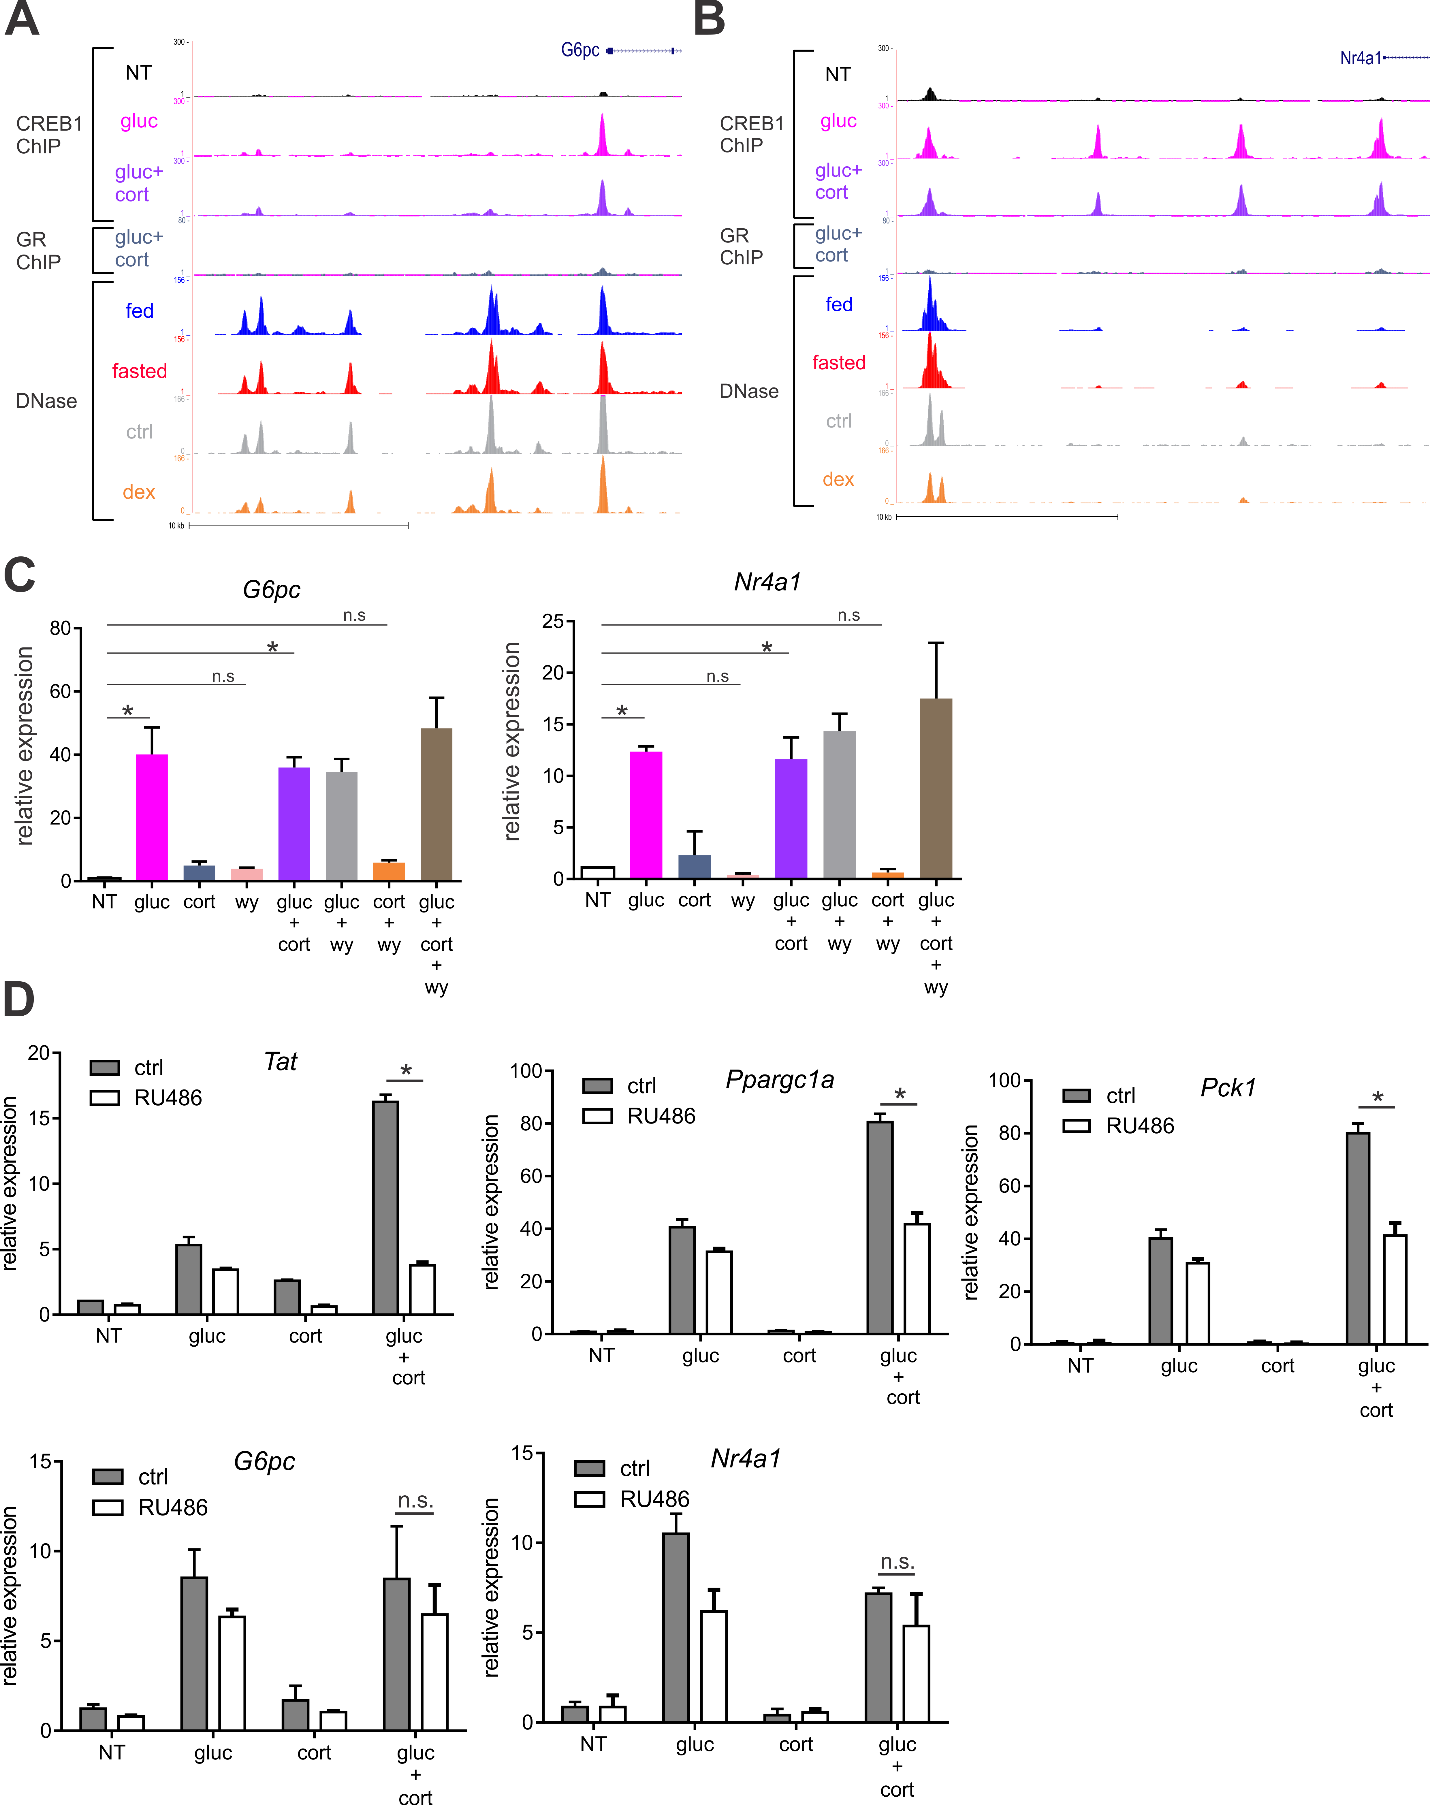


Supplemental Figure S5: GR does not increase all CREB1 binding sites nor the expression of adjacent CREB1-induced genes

A+B. Genome browser tracks of the *G6pc* and *Nr4a1* loci. depicting no change in CREB1 binding following co-treatment with corticosterone.

C. Nascent RNA levels of fasting-induced genes (*G6pc* and *nr4a1*) in primary hepatocytes following a 3 hr treatment with different combinations of glucagon (gluc), corticosterone (cort) and WY-14643 (wy).

D. Nascent RNA levels of fasting-induced genes in primary hepatocytes following a 3 hr treatment with different combinations of glucagon (gluc) and corticosterone (cort) in the presence or absence of RU486 (inhibiting GR transcriptional activation). Cells were treated with RU486 20 minutes prior to hormone treatments.


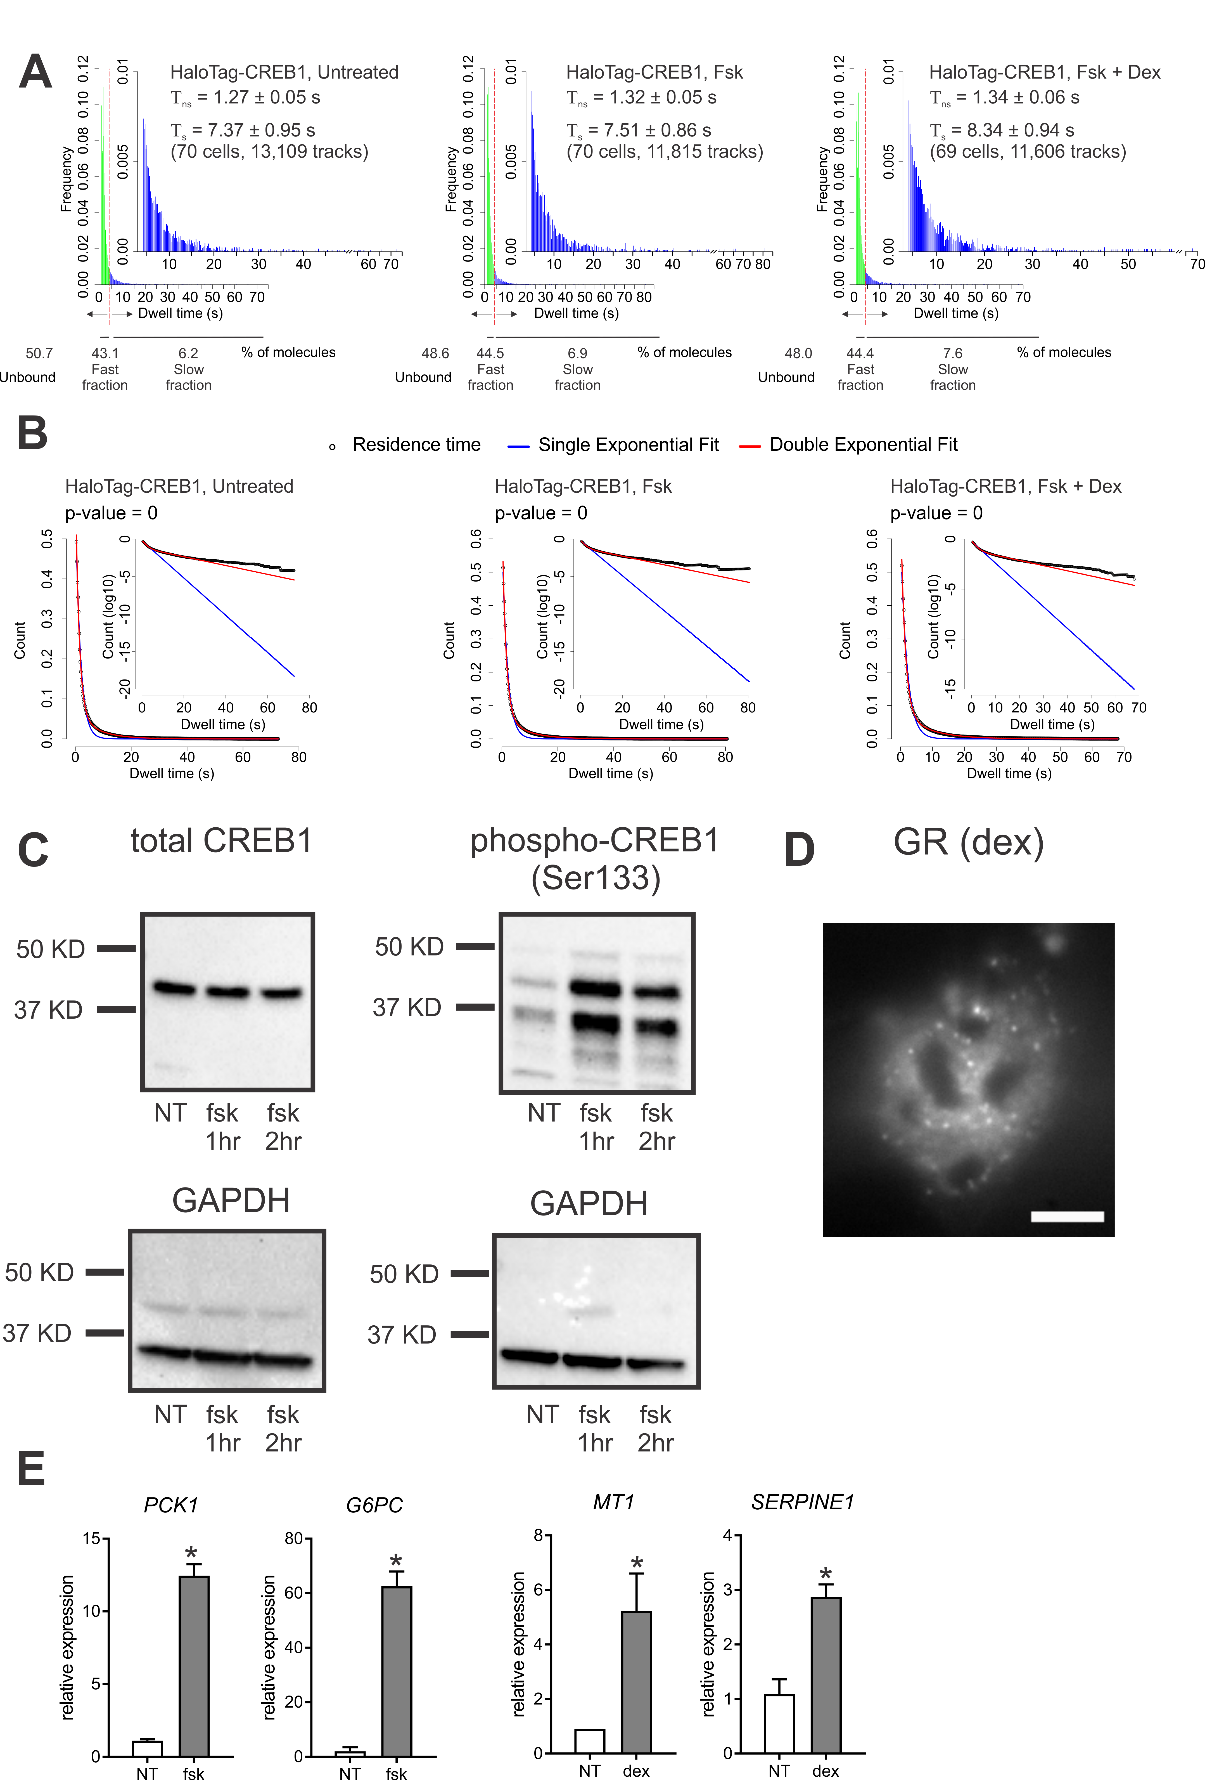


Supplemental Figure S6: Single-molecule tracking of CREB1 in HepG2 cells

A. Histograms represent the distribution of residence times. Red dashed line separates the fast short-lived fraction (green bars) from the slow long-lived fraction (blue bars). Expanded view represents slow long-lived fraction of the residence time distribution. The average residence time of fast short-lived (Τns) and slow long-lived (Τs) fraction are presented in the histogram. The percentage of molecules unbound, bound at the fast short-lived fraction, and bound at the slow long-lived fraction is presented below the histogram for the different treatments. NT: 70 cells, 13,109 tracks. Forskolin (fsk): 70 cells, 11,815 tracks. Fsk+dexamethasone (dex): 69 cells, 11,606 tracks.

B. Data represents collected tracks (black circles) showing the single-molecule residence times fitted to a single- (blue line) or double-exponential (red line) decay model. Expanded view represents the single-molecule residence time fitted to a single- (blue line) or double-exponential (red line) decay model with y-axis plotted as a log10. F-test determines the statistical significance of the fit for each treatment condition.

C. Western blot of CREB1 and phospho-CREB1 (Ser133) following activation by forskolin in HepG2 cells.

D. Image of a Halo-Tag-GR-transfected cell shows GR is localized in the nucleus following dexamethasone treatment (100nM, 30min., scale bar = 5 µm)

E. mRNA levels of CREB1- and GR-induced genes in HepG2 cells following a 3 hr treatment with forskolin (fsk, 10 µM) or dexamethasone (dex, 100nM).

**Supplemental captions**

Supplemental Movie S1 (separate file):

“Single-molecule tracking of Halo-Tag-CREB1 in the untreated condition (300 frames at 10 fps - 2X real time)”

Supplemental Movie S2 (separate file):

“Single-molecule tracking of Halo-Tag-CREB1 following forskolin treatment (300 frames at 10 fps - 2X real time)”

Supplemental Movie S3 (separate file):

“Single-molecule tracking of Halo-Tag-CREB1 following forskolin+dexamethasone treatment (300 frames at 10 fps - 2X real time)”

Supplemental Table S1 (separate file):

“Fasting-regulated genes from RNA-seq”

Supplemental Table S2 (separate file):

“Closest gene to fasting-induced enhancers”

Supplemental Table S3 (separate file):

“Euclidean distance of motifs from mean point”

Supplemental Table S4 (separate file):

“Genomic coordinates of differentially-regulated DHS sites and ChIP-seq peaks”

Supplemental Table S5 (separate file):

“DEseq for fasting-responsive DHS/H3K27ac sites”

Supplemental Table S6 (separate file):

“Summary of all sequencing data”

**Supplemental Methods**

*Reagents*

Corticosterone (Sigma, C2505, reconstituted in ethanol) treatments were at a final concentration of 1.7 μM, this concentration was chosen to reflect corticosterone serum levels in 24 hrs-fasted mice (Fig. 3F). Glucagon (Sigma, G2044, reconstituted in 25mM HEPES, pH=7.3) treatments were at a final concentration of 10 nM. Forskolin (Sigma, F3917, reconstituted in DMSO) treatments were at a final concentration of 10 μM. Wy-14643 (Sigma, C7081, reconstituted in DMSO) treatments were at a final concentration of 10 μM. Dexamethasone (Sigma, C7081, reconstituted in DMSO) treatments were at a final concentration of 100 nM. RU486 (Sigma, M8046, reconstituted in ethanol) treatments were at a final concentration of 2 μM. Antibodies used: CREB1 (Cell Signaling Technologies, #9197), phospho-CREB1 (Ser133) (Cell Signaling Technologies, #9198), CEBPB (Santa Cruz biotechnology, sc-150) and H3K27ac (Active motif #39133). For GR ChIP a cocktail of three antibodies was used: PA1-511A (ThermoScientific), MA1-510 (ThermoScientific) and M-20 (sc-1004, Santa Cruz).

*Primary mouse hepatocytes isolation and culture conditions*

Hepatocytes isolated by the two-step collagenase perfusion technique as described (Li et al. 2010) with some modifications. Briefly, mice were sacrificed by cervical dislocation and the liver was immediately perfused through the vena cava with HBSS (no calcium, no magnesium, no phenol red, Gibco, 14175-095) + 0.5mM EDTA + 25mM HEPES. Then, 30 ml of liver digest medium (Gibco, 17703-034) was pumped through the liver. During perfusion the portal vein was cut and periodically clamped for 10 sec. liver was excised into 10 ml of liver digest medium. Liver content was gently released to medium, spun down at 50 g and spun down again with 1:1 phosphate-buffered Percoll solution (Sigma, P1644) and DMEM at 200 g, washed with DMEM, spun at 50 g and plated on BioCoat collagen-coated plates (Corning) with dexamethasone-free plating media (Gibco, CM3000). 4 hrs after plating media was changed to dexamethasone-free maintenance media (Gibco, CM4000).

*Chromatin immunoprecipitation (ChIP)*

Snap frozen livers (200 mg) were homogenized (TissueRuptor, Qiagen) in PBS with 1% formaldehyde and crosslinked under shaking for 10 min at room temperature and quenched with 0.125 M glycine. Primary hepatocytes (7x106 cells in a collagen-coated 15 cm plate, Corning) were crosslinked with 1% formaldehyde under shaking for 10 min at room temperature and quenched with 0.125 M glycine. Crosslinked material was washed in PBS, resuspended in ChIP lysis buffer (0.5% SDS, 10mM EDTA, 50mM Tris-HCl pH8) and sonicated (Bioruptor, Diagenode) to release ~500 bp fragments. Antibodies were conjugated to magnetic beads (DynaBeads, Invitrogen) for 2 hrs at 4 °C. Chromatin was pre-cleared for 2 hrs with unconjugated beads and then immuneprecipitated with beads-Ab conjugates O/N at 4 °C. Immunocomplexes were washed sequentially with the following buffers: low-salt buffer (0.01% SDS, 1% Triton x-100, 2mM EDTA, 20mM Tris Hcl pH8, 150mM NaCl), high salt buffer (0.01% SDS, 1% Triton x-100, 2mM EDTA, 20mM Tris HCl pH8, 500mM NaCl), LiCl buffer (0.25M LiCl, 1% NP-40, 1% deoxycholate, 1mM EDTA, 10mM Tris-HCl pH8) and TE buffer (10mMTris-HCl, 1mM EDTA pH8). Chromatin was de-proteinized for 2 hrs at 55 °C (proteinase K, Ambion) and de-crosslinked O/N at 65 °C. DNA was subsequently phenol/chloroform purified and ethanol precipitated.

Primers used in ChIP-qPCR:

*Gm6484* promoter region Fwd: CTGAGCTTGCCCACTACCTC, Rev: ATGGTTAACCGGCCATGGTT

*Nr4a1* CREB peak Fwd: GATCAAACAATCCGCGCTC, Rev: ATGTCTGCGCGCGTGA

*G6pc* CREB peak Fwd: ATCAGGCTGTTTTTGTGTG, Rev: CATCATCAGTAGGTTGATGC

*Tat* CREB peak Fwd: AGCTGTCAACACCTGGAGTG, Rev: TCCTGTACTACGGAGGTTGGT

*Mfsd2a* CREB peak Fwd: CTGACTGTCTTCCAGCCAGG, Rev: AACCACAGCTGGCAACTCTT

*Got1* CREB peak Fwd: CTTTCTGTACCCGCTGAGCA, Rev: GTACAGTGTGTCCAAGCGGA

*RNA isolation and quantitative real-time PCR (qPCR):*

Total RNA was isolated using NucleoSpin kit (Macherey-Nagel) according to the manufacturer’s protocol. When isolating RNA from primary hepatocytes, 350 µl of lysis buffer was directly applied to plate. When isolating RNA from liver, 30 mg of tissue was homogenized in 600 µl of Macherey-Nagel lysis buffer (TissueRuptor, Qiagen). A 1 µg aliquot of total RNA was reverse transcribed using iScript cDNA synthesis kit (Bio-Rad, 170-8891). qPCR was performed with a C1000 Touch thermal cycler CFX96 instrument (Bio-Rad) using iQ SYBR Green supermix (Bio-Rad, 170-8887). All hepatocyte qPCR experiments were replicated at least three independent times. Error bars represent s.d. of technical replicates. Gene values were normalized with *Tbp* (mouse) or *HPRT* (human). The primers used in this study (except for *Tbp,* human *PCK1* andhuman *G6PC*) were designed to amplify nascent transcripts (i.e. the amplified region span exon-intron junctions) as a proxy for transcription to avoid confounding post-transcriptional events.

Mouse primers used in qPCR:

*Tbp* Fwd: CCCTATCACTCCTGCCACACCAGC, Rev: GTGCAATGGTCTTTAGGTCAAGTTTACAGCC

*Hmgcs2* Fwd: CAAAACCTGGGGTCCTGGAG, Rev: AGCTCGGCTCACCTTCTTTC

*Ppara* Fwd: GGGGGACTGCATAGTTTGTCA, Rev: CTCGGCCATACACAAGGTCT

*Tat* Fwd: CCAGAGGAAAGCATCCCAGG, Rev: ATGGGGACATTGGTGCTGAG

*Ppargc1a* Fwd: GTCCAGCTCCCCATACATCAG, Rev: CAACAATGAGCCTGCGAACAT

*Pdk4* Fwd: GATTGACATCCTGCCTGACC, Rev: TTCAAAACCGTGTGTCCTCA

*G6pc* Fwd: CTGGACACCGACTACTACAGC, Rev: ACACACATGACGTTAGTGCCA

*Ech1* Fwd: TGGCCCTGAACGCTACATAAC, Rev: TCACGGAGGTACCAGGCTAT

*Hadhb* Fwd: TTGCTGGCTCCTTTTTATACAGC, Rev: CACACTGGCCAGAAGCTATCA

*Mfsd2a* Fwd: TTGTTCTCTTCCCAAACCCCTG, Rev: AGAATGGCTCTGTGGTGGTC

*Pck1* Fwd: ATCCACATCTGCGATGGCTC, Rev: GCTGTGGGCCAGAGAGTTAG

*Pex11a* Fwd: TCCAGGGTCTGAGGCTAAGG, Rev: CAAGAGGCTGGAGACCAGTG

*Sgk1* Fwd: GGGAATGGTAGCGATTCTCATCG, Rev: CGACGCCACACGCTAATCTG

*Nr4a1* Fwd: ACTTCGGCGGAGTTGAATGA, Rev: GACCACTTGCAGAGAACCCG

Human primers used in qPCR:

*HPRT* Fwd: CCTGGCGTCGTGATTAGTGAT, Rev: AGACGTTCAGTCCTGTCCATAA

*PCK1* Fwd: CACAAGGTCATTTAAGGGCCA, Rev: CGACACCGAAAAAGCCATTT

*G6PC* Fwd: CGACCTACAGATTTCGGTGCTT, Rev: ATGAGGAAAATGAGCAGCAAGG

*SERPINE1* Fwd: CCGCCTCTTCCACAAATCAGA, Rev: GAGACCCCAGGAATGAGATGC

*MT1* Fwd: CCTCACTTACTCCGTAGCTCCAGC, Rev: Mt1nsct Rev TCCCGCCAAGCCTCTACAACTC

*Single-molecule tracking*

HepG2 cells were cultured in a humidified incubator at 37C and 5% CO2 in DMEM. Media were supplemented with 10% FBS, Pen/Strep, pyruvate and glutamine (Gibco). Cells were transiently transfected with pHaloTag-CREB1 (Promega, pFN21AB5414) using Lipofectamine 2000 (Invitrogen) at sub-optimal conditions to achieve appropriate protein levels. After transfection cells have been treated with 5 nM of the cell-permeable Janelia Fluor 549 (JF549) HaloTag ligand (Grimm et al. 2015) for 20 min. The cells were then washed 3 times for 15 min. with phenol red free DMEM media (Invitrogen) to remove the unbound HaloTag ligand. Subsequently, cells were treated with 10 μM forskolin, 100 nM dex or left untreated for 30 min. before imaging. Three independent experiments were performed and data from ~70 cells across replicates was collected and analyzed. The custom built microscope is controlled by µManager software (UCSF, San Francisco, CA.) equipped with a 150X, 1.45 NA objective, a 561 nm laser and HILO illumination (Tokunaga et al. 2008). Six hundred frames of fluorescent images are collected at a rate of 5 Hz with a 10 millisecond exposure time on an EM-CCD camera (Evolve 512, Photometrics). The particle tracking is performed with the “TrackRecord” software developed in Matlab (The Matworks Inc.) (Mazza et al. 2013). The software combines a package for single-particle and single-molecule tracking (Crocker and Grier 1996) with the routines to isolate and analyze the behavior of chromatin-bound molecules. The number of cells and tracks analyzed per condition are described in Figure S6 legend. The collected data has been corrected for photobleaching as previously described (Morisaki et al. 2014) and then fitted to double-exponential decay model with a F-test utilized to determine the significance of the fit. The average residence time of fast short-lived (Τns) and slow long-lived (Τs) fraction is presented in the histogram. Residence times and bound fraction are determined by the fitting to the survival distribution (Mazza et al. 2013). Briefly, the survival histogram is generated from the time periods that each particle is stationary. In practice, even tightly bound particles move slightly due to chromatin and nuclear motion, and therefore a maximum frame-to-frame displacement of 220 nm, and a two-frame displacement of 315 nm (both obtained from the motion of immobile histones) have been used to define bound portions of each particle’s track. The total bound fraction is then calculated as the ratio of bound track segments to the total number of particles. To extract residence times, the survival distribution, S(t), is fit by least squares to a mixed exponential decay with two rate constants, kns = 1/Tns and ks = 1/Ts :

where B is the bound fraction, and Fns is the fraction of particles non-specifically bound. To check for over-fitting, the distribution is also fit to a single-component exponential:

and the fits are compared using an F-test to ensure that the two-component model gives a significantly improved fit over the single component decay.

Single molecules could not be measured in primary hepatocytes due to high, non-specific binding of JF549.

*Footprint depth calculation, flanking accessibility and scatter plots*

Observed Cuts:

We generated DNase cut count profiles from ultra-deep sequencing of DNase-seq libraries, as previously described (Sung et al. 2014). Cut count is the number of DNase cuts at a base in the genome. Because a single cut in a DNA segment by DNase generates two end nucleotides, 5′ and 3′, we set the location to be the 5′ nucleotide to define cut count profile independently of the read strand from sequencing. If a read is mapped onto the forward strand, the cut site is defined as the −1 nucleotide (immediately 5′) from where the read starts. If a read is in the reverse strand, we define the cut site to be the first base of the read. Cut counts were normalized by 100 million / the total number of non-mitochondrial reads.

Expected Cuts:

We normalized cut counts to the DNase sequence cut bias. For each base j in the genome, normalized expected cleavage rate n_j^' was calculated as described (Stergachis et al. 2014). The per-nucleotide deviation from intrinsic DNase sequence specificity was calculated as

〖d_j=log〗_2 n_j⁄(n_j^' ) where n_j is the observed cut counts at the base j.

Footprint Depth:

We defined the footprint depth F_j of a given motif element as Fj = the average of d_j in the motif region (extended 2bp from the boundary of the PWM) minus the average of d_j in the +/- 200bp around the motif center. We estimated the center of each PWM to the position that minimize the Manhattan distance between the matrix and its reverse complement matrix at the position.

Candidate motif sites:

We collected 650 position weight matrices (PWMs) of known motifs for the mouse genome from TRANSFAC (Matys et al. 2006), JASPAR (Sandelin et al. 2004) and UniPROBE (Hume et al. 2015) databases. Candidate motif sites for each motif was identified using FIMO (Grant et al. 2011) version 4.10.1 at P < 0.0001 to scan the mouse reference genome (NCBI 37/mm9). After omitting motifs of which each has less than 10000 candidate sites, 634 candidate motifs were used in the analysis.

Footprint-flanking accessibility scatter plots

We developed a Footprint-flanking accessibility phase diagram to represent quantitative changes in footprint depth and DNase accessibility around all known binding motifs. We used 634 candidate motifs (see above). In the plot, the values of X axis are the difference of the average normalized tag counts between fed and fasted DNase data of the +/- 200bp region at each motif centers. The Y axis values are the difference of the average footprint depth defined above. The larger size of circle represents a deeper footprint depth at the fasted condition of the motif.

Euclidean distance

For each motif, the Euclidean distance between the values of an individual motif and the mean point of all motifs was calculated. Then, the 0.95 quantile Q.95 of the distances was calculated and motifs with distance greater than Q.95 were classified as outliers.

*Western blot*

Cells were treated with forskolin for either 1 or 2 hrs. Then, cells were lyzed with RIPA buffer and 50 µg of protein was loaded on Mini-PROTEAN TGX stain free gels (4-20% gradient, Bio-Rad), proteins were transferred to PVDF membrane (Trans Blot Turbo, Bio-Rad) and incubated with primary antibody (1:1000 anti-CREB1 Cell signaling technologies Cat#9197, 1:1000 anti-phospho-CREB1 Ser133, Cell signaling technologies Cat#9198, 1:75000 anti-GAPDH Abcam Cat# ab8245) for 1 hr at room temperature. After three washes with Tris-buffered saline (0.3% tween), membranes were incubated with secondary HRP-conjugated antibody for 1 hr followed by 1 min. incubation with SuperSignal Pico (Pierce, Thermo) and imaging with ChemiDoc (Bio-Rad).

**Supplemental References**

Boergesen M, Pedersen TA, Gross B, van Heeringen SJ, Hagenbeek D, Bindesboll C, Caron S, Lalloyer F, Steffensen KR, Nebb HI et al. 2012. Genome-wide profiling of liver X receptor, retinoid X receptor, and peroxisome proliferator-activated receptor alpha in mouse liver reveals extensive sharing of binding sites. *Mol Cell Biol* **32**: 852-867.

Crocker JC, Grier DG. 1996. Methods of digital video microscopy for colloidal studies. *Journal of colloid and interface science* **179**: 298-310.

Grant CE, Bailey TL, Noble WS. 2011. FIMO: scanning for occurrences of a given motif. *Bioinformatics* **27**: 1017-1018.

Grimm JB, English BP, Chen J, Slaughter JP, Zhang Z, Revyakin A, Patel R, Macklin JJ, Normanno D, Singer RH et al. 2015. A general method to improve fluorophores for live-cell and single-molecule microscopy. *Nat Methods*.

Grontved L, John S, Baek S, Liu Y, Buckley JR, Vinson C, Aguilera G, Hager GL. 2013. C/EBP maintains chromatin accessibility in liver and facilitates glucocorticoid receptor recruitment to steroid response elements. *EMBO J* **32**: 1568-1583.

Hume MA, Barrera LA, Gisselbrecht SS, Bulyk ML. 2015. UniPROBE, update 2015: new tools and content for the online database of protein-binding microarray data on protein-DNA interactions. *Nucleic Acids Res* **43**: D117-122.

Li WC, Ralphs KL, Tosh D. 2010. Isolation and culture of adult mouse hepatocytes. *Methods Mol Biol* **633**: 185-196.

Matys V, Kel-Margoulis OV, Fricke E, Liebich I, Land S, Barre-Dirrie A, Reuter I, Chekmenev D, Krull M, Hornischer K et al. 2006. TRANSFAC and its module TRANSCompel: transcriptional gene regulation in eukaryotes. *Nucleic Acids Res* **34**: D108-D110.

Mazza D, Ganguly S, McNally JG. 2013. Monitoring dynamic binding of chromatin proteins in vivo by single-molecule tracking. *Methods Mol Biol* **1042**: 117-137.

Morisaki T, Muller WG, Golob N, Mazza D, McNally JG. 2014. Single-molecule analysis of transcription factor binding at transcription sites in live cells. *Nat Commun* **5**: 4456.

Sandelin A, Alkema W, Engstrom P, Wasserman WW, Lenhard B. 2004. JASPAR: an open-access database for eukaryotic transcription factor binding profiles. *Nucleic Acids Res* **32**: D91-D94.

Stergachis AB, Neph S, Sandstrom R, Haugen E, Reynolds AP, Zhang M, Byron R, Canfield T, Stelhing-Sun S, Lee K et al. 2014. Conservation of trans-acting circuitry during mammalian regulatory evolution. *Nature* **515**: 365-370.

Sung MH, Guertin MJ, Baek S, Hager GL. 2014. DNase footprint signatures are dictated by factor dynamics and DNA sequence. *MolCell* **56**: 275-285.

Tokunaga M, Imamoto N, Sakata-Sogawa K. 2008. Highly inclined thin illumination enables clear single-molecule imaging in cells. *Nat Methods* **5**: 159-161.
